# Supplementary material for: Cholesterol Accumulation as a Driver of Hepatic Inflammation Under Translational Dietary Conditions Can Be Attenuated by a Multicomponent Medicine
Source: Front Endocrinol (Lausanne). 2021 Mar 18;12:601160. doi: 10.3389/fendo.2021.601160 (PMC8014004; doi:10.3389/fendo.2021.601160)
Supplement: Supplementary file 2 [file Table_2.xlsx]

## Sheet: Supplemental table 2
Supplemental table 2: modulated upstream regulators in HFD + vehicle vs. chow
Upstream Regulator	HFD + vehicle vs chow
	-log(p-value)	-log(z-value)
lipopolysaccharide	52.0856	9.86265
TGFB1	43.714	8.47314
TNF	41.489	9.36876
IFNG	40.6046	6.99753
methylprednisolone	38.0928	0.90589
TP53	36.0024	0.9225
dexamethasone	31.9783	0.079822
POR	31.0329	0.974355
ACOX1	29.8915	-6.78718
ERBB2	29.4492	3.92132
beta-estradiol	27.6398	2.45073
IL6	27.586	5.82459
PPARA	27.1029	1.91965
IL4	26.8867	2.95316
IL13	25.0761	4.06452
thioacetamide	24.8357	4.91844
IL1B	24.5419	7.81826
MGEA5	24.4371	2.55742
ciprofibrate	22.8631	5.9826
tretinoin	22.8543	7.74804
CSF2	22.4452	8.18186
TNFSF11	21.9842	4.74917
TCL1A	21.7443	1.41972
HRAS	20.9959	1.20601
cholesterol	20.9356	5.50167
E. coli B4 lipopolysaccharide	20.1814	6.50557
NFKBIA	19.9317	4.8882
dihydrotestosterone	19.7309	1.73782
calcitriol	19.6028	-0.745041
progesterone	19.4489	0.412835
ESR1	19.4245	2.31988
RORC	19.238	0.816497
VEGFA	19.1722	4.88533
APP	18.7758	3.96901
FOXO1	18.6235	3.99552
PDGF BB	18.5478	4.06331
AHR	18.4893	-3.28142
doxorubicin	18.3628	3.61322
TP73	18.2197	0.381303
MYC	18.0318	-1.26915
RORA	17.7706	0.919987
carbon tetrachloride	17.6042	5.75625
AGT	17.4544	6.07006
IL10RA	17.337	-3.79857
CEBPA	17.1905	2.62897
PD98059	17.1452	-4.90002
SP1	17.133	3.8452
camptothecin	17.0149	2.37807
TO-901317	16.9641	0.195908
FAS	16.7571	-2.37992
E. coli B5 lipopolysaccharide	16.5694	7.10873
NR3C1	16.4628	-1.46652
RICTOR	16.3471	6.06369
HNF4A	16.3024	-3.07075
Cg	16.1477	5.19278
cisplatin	16.06	4.44577
INSIG1	15.9697	-1.46881
CSF1	15.8074	5.75673
Alpha catenin	15.7736	-6.97793
dextran sulfate	15.5003	1.59368
D-glucose	15.492	3.69136
IL5	15.1308	4.15012
AGN194204	15.1133	4.65782
cardiotoxin	14.9965	5.89718
halofuginone	14.8992	-2.43287
simvastatin	14.8616	-2.08116
DYSF	14.7287	N/A
STAT3	14.6967	3.83398
mir-21	14.5821	-4.55303
CHUK	14.5551	5.16894
IFNB1	14.5507	4.95435
fluticasone propionate	14.4822	-1.20645
GPD1	14.3829	N/A
LEP	14.159	2.2525
MYCN	14.1057	-4.46778
FOS	14.037	1.68617
STAT1	13.8921	7.08256
PRL	13.8899	4.9944
SLC25A13	13.8762	N/A
L-dopa	13.7377	-2.37384
salmonella minnesota R595 lipopolysaccharides	13.581	6.48286
paclitaxel	13.5327	1.11341
vancomycin	13.5313	4.79273
NFE2L2	13.5176	0.146028
APOE	13.4521	-3.46093
1,4-bis[2-(3,5-dichloropyridyloxy)]benzene	13.3593	0.690999
IKBKB	13.2803	4.75741
CD40LG	13.2471	3.48163
SP3	13.1855	1.70503
HGF	13.1642	5.85091
17-alpha-ethinylestradiol	13.1385	2.03115
forskolin	13.0687	2.74446
LDL	13.0557	5.31189
Vegf	12.9897	6.77561
CD44	12.9332	6.38099
FECH	12.7286	N/A
SB203580	12.7284	-7.16924
ciprofloxacin	12.7009	0.336336
IGF1	12.6847	3.94192
IL2	12.6752	6.29275
bleomycin	12.6065	5.22407
rosiglitazone	12.602	-0.435629
genistein	12.5797	3.02153
pirinixic acid	12.4712	0.847157
IFNAR1	12.3905	4.48085
nitrofurantoin	12.3892	3.3126
F2	12.2886	6.691
cycloheximide	12.2232	-0.858596
triamterene	12.2039	4.22667
fenamic acid	12.1204	4.24374
Sos	12.1066	N/A
phorbol myristate acetate	12.0333	6.95006
LY294002	12.019	-6.16368
SMARCB1	11.9253	-0.253125
Lh	11.8747	0.75935
CD38	11.8646	2.38835
FOXO3	11.8497	0.775071
CEBPB	11.8426	3.21498
ADRB	11.8352	-0.324935
sirolimus	11.7842	-1.11348
KRAS	11.7802	-1.02031
trichostatin A	11.6141	2.44825
U0126	11.4622	-4.83493
SPP1	11.4563	2.35934
INSR	11.4411	-5.32145
EPAS1	11.3709	1.66685
FOXO4	11.1701	2.46054
ethanol	11.1378	3.42141
STAT4	11.0957	4.45806
EGF	11.0866	7.93567
HIF1A	11.0864	4.18961
PPARG	11.0575	-0.745479
SREBF2	11.0466	-3.58764
CSF3	10.9849	4.11912
poly rI:rC-RNA	10.9751	6.4215
E. coli serotype 0127B8 lipopolysaccharide	10.966	3.72063
allopurinol	10.9572	3.31662
diethylnitrosamine	10.9572	4.49987
2-bromoethylamine	10.9311	4.08597
SIRT1	10.9177	-2.09761
S100A8	10.9075	1.65176
TGM2	10.8555	6.18936
indomethacin	10.8041	1.37288
troglitazone	10.7842	-2.5227
mir-223	10.772	4.69714
IL3	10.714	2.73451
Immunoglobulin	10.6906	-0.823177
SREBF1	10.5398	-1.51476
OSM	10.5349	5.06225
valproic acid	10.5026	0.891713
SCAP	10.4796	-4.83691
STAT6	10.4322	0.739334
SOX4	10.4315	2.87216
PGR	10.4194	3.93415
SMARCA4	10.3663	4.92316
deferoxamine	10.3252	3.0665
TSC2	10.3031	-4.83404
Ifnar	10.3025	5.99335
PSEN1	10.2708	-0.35509
AR	10.2664	3.22024
PLAU	10.1494	4.01242
hexachlorobenzene	10.0941	4.59833
TFRC	10.0791	-0.666667
phenylbutazone	10.0275	3.63803
HTT	9.99607	4.14367
gentamicin C	9.97476	4.22577
PTEN	9.89776	-1.0887
resiquimod	9.89615	5.07408
N-cor	9.89047	-3.32233
cyclosporin A	9.87563	0.477126
Insulin	9.86708	2.06807
methapyrilene	9.82572	2.89747
lomustine	9.7184	3.90095
atorvastatin	9.71816	-4.04932
Tgf beta	9.66428	3.04406
RRP1B	9.62034	N/A
IL17A	9.60102	5.09606
EDN1	9.57084	5.23576
IKBKG	9.56061	4.4687
CREB1	9.49784	4.43561
MYD88	9.46491	6.55253
P38 MAPK	9.46207	5.88518
RETNLB	9.42383	4.04411
KLF3	9.40959	-3.64209
TP63	9.37794	2.21965
ABCB4	9.37543	-4.14378
CDKN2A	9.33181	-0.596336
S100A9	9.29874	2.6302
ESR2	9.25576	1.64231
acetaminophen	9.20598	4.89465
PTGER4	9.16435	-3.32599
PI3K (complex)	9.15998	4.73505
AKT1	9.15199	3.09775
HOXA10	9.13367	-1.02472
NRAS	9.08906	0.903513
NFkB (complex)	9.04866	7.58462
FGF19	9.03781	1.43448
KLF2	8.82513	-2.87888
ARNT	8.76613	1.21741
butyric acid	8.75751	0.454382
TCF4	8.72795	1.10765
ERK1/2	8.71081	5.24435
TWIST1	8.69424	3.49669
cigarette smoke	8.6785	3.89673
TCF3	8.66578	-0.943528
TCR	8.66375	0.276151
PPARD	8.65972	0.960737
ERK	8.63519	5.92347
IL10	8.58434	1.2773
bromobenzene	8.54894	1.87838
EGR1	8.53991	3.37418
prostaglandin E2	8.5245	1.80201
NKX2-3	8.46779	-1.57067
EGFR	8.46252	2.63298
RXRA	8.44235	1.04056
TLR4	8.43589	5.2833
BIRC5	8.38759	-1.9799
IFN alpha/beta	8.38386	4.64942
captopril	8.3628	3.06489
SMAD7	8.2889	-3.02434
Brd4	8.27238	4.59573
hydrogen peroxide	8.25489	3.23086
ATP7B	8.24911	-4.26401
HRG	8.21602	3.97273
CTNNB1	8.18756	2.6991
carboplatin	8.17127	1.67159
D-fructose	8.14284	4.42881
lipoteichoic acid	8.11615	3.84318
ZFP36	8.07388	-4.70261
CCR1	8.07122	2.18657
Nr1h	8.045	-2.19641
TRIM24	8.03236	-5.97516
MAPK1	8.03122	-0.912291
Akt	7.98392	4.12333
TICAM1	7.95979	5.22012
IL1	7.94965	5.38894
HNF1A	7.92148	-1.13607
FSH	7.88394	0.479849
CREBBP	7.86825	2.72636
Interferon alpha	7.83389	7.22798
PTGER2	7.81781	4.14146
NOS2	7.79613	3.75282
TGFBR2	7.79613	0.744814
MAP2K1	7.78461	5.84651
ZBTB16	7.76165	-0.76343
COL18A1	7.72643	-4.34393
salirasib	7.70597	-3.18087
RELA	7.70535	4.38593
pyrrolidine dithiocarbamate	7.66551	-3.07735
TERC	7.66221	-1
NFKB1	7.65734	4.49911
gefitinib	7.63575	0.42018
SOD1	7.58972	-2.18019
Hbb-b1	7.57279	1.93573
VCAN	7.55319	-1.59871
estrogen receptor	7.54147	-2.63932
LCN2	7.51104	3.53911
IL1A	7.50027	5.71566
bee venom	7.49842	0.235654
IRF8	7.49361	2.54319
fulvestrant	7.49136	-0.5308
CCR2	7.48812	2.43455
RABL6	7.47026	3.18198
mifepristone	7.46967	-3.16065
actinomycin D	7.46168	-2.29006
IRF7	7.44465	6.14816
homocysteine	7.42678	1.03687
MAP3K8	7.41329	1.57612
chloropromazine	7.35975	-1.8999
ibuprofen	7.35975	-0.810564
VHL	7.35395	-2.55866
cholic acid	7.35259	3.81475
EP300	7.34494	2.89505
bucladesine	7.31609	2.04743
NR1I2	7.2954	0.566997
staurosporine	7.2895	-0.581935
BRD4	7.28478	3.95559
GPS2	7.27052	-1.84094
NR1I3	7.24923	-1.51151
LMNB1	7.24746	2.15666
medroxyprogesterone acetate	7.15525	-1.57901
CLOCK	7.10424	1.18111
Irgm1	7.09125	-4.48665
ABCB6	7.09125	-1.20121
MTOR	7.08569	1.35082
enalapril	7.01593	2.00461
CDKN1A	6.98288	-1.54462
PTH	6.95194	2.29038
cholecalciferol	6.94741	3.7603
Ins1	6.93693	2.73262
DUSP1	6.89559	-0.997629
PPARGC1A	6.84689	-2.06322
fenofibrate	6.83377	0.0438427
RNA polymerase II	6.8312	N/A
Mek	6.82324	1.09886
JUN	6.81583	3.20231
UCP1	6.8062	-1.12285
rifampin	6.79988	0.722632
5-O-mycolyl-beta-araf-(1->2)-5-O-mycolyl-alpha-araf-(1->1')-glycerol	6.75851	3.81591
CYR61	6.75851	1.86481
trinitrobenzenesulfonic acid	6.71516	5.57969
PDX1	6.70165	3.33734
SP600125	6.65235	-3.66714
phenacetin	6.61723	3
MET	6.61253	3.52913
CCL5	6.60959	2.40492
IL15	6.54921	4.36353
alitretinoin	6.54569	0.529303
TNFRSF1A	6.51672	3.64848
plicamycin	6.4753	-1.86104
sulindac	6.44885	-0.384881
IRF3	6.42401	5.09516
TAZ	6.41802	0.59612
Hbb-b2	6.39948	3.1305
palmitic acid	6.38661	3.43673
NPC1	6.37076	-2.91286
SRSF2	6.37076	1.45914
SOCS1	6.34741	-4.72805
LEPR	6.3434	-0.808403
GNA15	6.34334	N/A
PRKAA1	6.34334	-2.54548
5-N-ethylcarboxamido adenosine	6.34085	0.378655
benzo(a)pyrene	6.2874	1.10331
HMGA1	6.28328	1.38832
IGF2	6.26424	1.26067
ursodeoxycholic acid	6.23073	2.69781
vitamin E	6.23073	-3.16496
hyaluronic acid	6.2224	3.69843
PEX5L	6.21929	2.73861
RARA	6.21138	1.47968
NR1H3	6.20911	0.21467
isobutylmethylxanthine	6.2056	1.43845
emodin	6.19907	-2.4071
MFSD2A	6.19792	N/A
MED13	6.18175	-0.839181
MTPN	6.18085	5.23969
STK11	6.14795	-1.98954
COLQ	6.13404	N/A
mibolerone	6.08259	-0.581956
CD3	6.08216	-1.88981
FN1	6.0583	3.46058
MAPT	6.0446	1.17711
TLR3	6.04161	5.84595
CYP27A1	6.0314	0.220644
CYP2E1	6.0314	1.95338
NR1H4	6.02682	-1.18844
HNRNPA2B1	6.02112	N/A
MUC1	6.01253	1.67242
eicosapentenoic acid	6.00916	0.784465
FOXM1	6.00578	4.93027
LIF	5.96745	2.88569
Jnk	5.96745	5.00966
NCSTN	5.96407	-2.70571
ethionine	5.93153	2.89828
inosine	5.931	2.99725
cerivastatin	5.91359	-2.02975
ritonavir	5.89566	-0.419172
IRS1	5.88985	1.45241
ezetimibe	5.87752	-3.43735
GW3965	5.85791	-0.626514
CCND1	5.84502	3.01257
pioglitazone	5.82967	-1.55835
RUNX2	5.81424	2.11562
SATB1	5.81298	-0.625611
methylselenic acid	5.81126	-1.19084
L-glutamic acid	5.81053	2.86709
THRB	5.8035	-0.228986
prednisolone	5.79672	-0.273513
SPI1	5.79654	4.4568
TCF7L2	5.76905	2.93451
MMP9	5.76152	2.26646
Ccl2	5.76076	1.98218
MKL2	5.73938	0
TERT	5.73363	-0.730153
metribolone	5.72058	0.00243
ACKR2	5.71167	-4.02492
NRG1	5.6375	2.78475
RUNX3	5.62355	-3.17576
IL21	5.60179	3.64272
ASXL2	5.59029	-1.21268
HNRNPK	5.59029	-0.384111
oleic acid	5.58864	1.27251
methotrexate	5.5745	-0.282972
TLR9	5.55908	5.22097
arsenite	5.51391	1.01264
TGFB3	5.51391	3.5983
COL4A3	5.48163	-1.98248
1,2-dithiol-3-thione	5.47785	-0.67028
GPX1	5.47374	-2.71822
RAC2	5.47374	N/A
SRC	5.47178	2.38457
FOLR1	5.46971	N/A
RHOA	5.46273	3.46732
Bay 11-7082	5.4414	-3.17073
BDNF	5.44114	0.414976
MITF	5.41673	3.50587
ATF4	5.39828	0.846352
SRF	5.39555	1.78835
curcumin	5.39366	-3.81479
docosahexaenoic acid	5.37196	-3.10173
FGF2	5.36553	5.02335
KITLG	5.33321	2.96822
propylthiouracil	5.32082	N/A
CARD9	5.31172	N/A
IPMK	5.2825	3.69274
pitavastatin	5.2825	-2.96326
RHO	5.27375	-1.56893
ZMPSTE24	5.26782	-1.46261
dimethylnitrosamine	5.26782	2.73719
IL12 (complex)	5.23935	3.70206
ERG	5.23897	4.09723
IGF1R	5.23707	-0.887187
FGFR2	5.23628	1.78506
MKL1	5.21331	0.751376
HNF1B	5.21247	-3.37599
AMPK	5.21247	-1.50129
MAP4K4	5.21247	2.34426
N-nitro-L-arginine methyl ester	5.1992	1.54213
lovastatin	5.1834	-1.35226
BNIP3L	5.18007	-0.656532
CYP1A1	5.17081	1.05279
POLG	5.16771	N/A
EDNRA	5.14112	3.16228
NREP	5.14112	0.18427
SP2	5.14112	N/A
GnRH-A	5.13529	3.80989
CEBPD	5.09623	2.06702
olanzapine	5.09623	1.53415
sterol	5.0947	0.413471
15-deoxy-delta-12,14 -PGJ 2	5.08264	-1.10433
thyroid hormone	5.08033	0.925563
RASSF1	5.07212	0.695287
crocidolite asbestos	5.05103	3.68826
rosuvastatin	5.05103	-2.75019
SMAD3	5.04138	3.87133
DNASE2	5.02883	-2.57333
E2F4	5.0283	-0.0140456
5-fluorouracil	5.02364	4.31969
PRKAG3	5.01549	N/A
cytarabine	5.01312	3.0093
CYP1B1	5.00914	1.74648
triamcinolone acetonide	5.00856	-1.07901
PRKCD	5.00242	3.79874
tamoxifen	5.00108	-0.373384
FOSL1	4.99184	0.296841
arachidonic acid	4.97723	1.22552
JUNB	4.9753	2.42491
platelet activating factor	4.96265	2.51236
RIPK2	4.9274	3.71334
GLI1	4.92573	3.60896
ID2	4.92533	-0.547216
cadmium chloride	4.92005	1.11048
sunitinib	4.92005	-1.84342
WISP2	4.92005	-3.20022
Creb	4.91984	3.21114
Cyp2c44	4.89876	-0.194019
ADAMTS12	4.87806	-3.85039
ramipril	4.87806	-3.35673
mir-122	4.8745	-4.05541
androgen	4.84496	0.882355
BTK	4.84176	0.297323
D-galactosamine	4.82404	3.17666
RB1	4.80916	-4.2053
CR1L	4.80643	-3.63697
deferasirox	4.80643	3.62106
25-hydroxycholesterol	4.80274	2.51527
IGFBP3	4.7999	0.719862
MAP3K1	4.79309	4.11478
DNMT3B	4.75962	-1.62879
PKD1	4.75868	-3.37687
Collagen type IV	4.75173	0.194257
FBN1	4.75173	-2.76069
NR3C2	4.73735	1.57218
FFAR3	4.72875	0.989778
ITK	4.72875	3.50023
SYK	4.72875	-1.69199
INHBB	4.71819	1.84115
S1PR2	4.71819	2.65028
Srebp	4.71819	0.629512
Ifn	4.7147	3.95052
INS	4.70011	0.0985239
JAK2	4.69472	3.87058
TREM1	4.6915	2.46274
decitabine	4.68618	4.97939
JAK1	4.68516	3.03253
MAPK14	4.6815	2.38186
sphingosine-1-phosphate	4.67772	3.0914
TRPV4	4.66195	3.70412
HMOX1	4.65806	0.183078
dehydroisoandrosterone	4.65665	-1.26439
BSCL2	4.65563	N/A
NCOR1	4.63269	0.35132
MOG	4.62975	2.11098
HDAC6	4.62825	2.0499
estrogen	4.62464	1.41934
Histone h4	4.61946	N/A
L-triiodothyronine	4.61386	-0.166552
NOX4	4.60971	1.24785
berberine	4.60547	-0.151077
miR-124-3p (and other miRNAs w/seed AAGGCAC)	4.59798	-3.0773
CBFB	4.58514	-0.194054
Nuclear factor 1	4.58358	-0.979804
PTX3	4.58358	-2.41137
tosedostat	4.58358	0.477334
XDH	4.58349	-0.0806223
IL1RN	4.58141	-4.54475
dimethyl sulfoxide	4.58141	0.940991
PRKAA2	4.57877	-2.44223
CEBPE	4.5771	2.53001
8-bromoguanosine 3',5'-cyclic monophosphate	4.57641	1.05771
gentamicin	4.57272	4.2421
tanespimycin	4.55526	-1.26126
N-acetyl-L-cysteine	4.54989	-4.50329
BID	4.54777	2.89076
vitamin K2	4.54777	1.71499
mono-(2-ethylhexyl)phthalate	4.51873	-1.16366
thapsigargin	4.51855	3.65936
POU2F1	4.51657	1.29732
PP2/AG1879 tyrosine kinase inhibitor	4.51431	-1.89453
ETS2	4.51313	1.83697
Raf	4.51313	2.37635
ETS1	4.50211	5.02827
resveratrol	4.47533	-2.91279
ELK1	4.47232	2.65409
NOTCH1	4.45592	1.55228
10E,12Z-octadecadienoic acid	4.44425	1.71132
miR-199a-5p (and other miRNAs w/seed CCAGUGU)	4.44425	-3.82079
RARB	4.43949	1.89474
tetrathiomolybdate	4.40095	-2.33333
KDM5A	4.39503	3.96659
WNT3A	4.39285	1.37012
dibutyl phthalate	4.38882	1.25771
NCOR-LXR-Oxysterol-RXR-9 cis RA	4.38882	2.16777
PLK4	4.38882	2.13809
cadmium	4.38443	1.19778
2-amino-5-phosphonovaleric acid	4.37066	-1.35608
CD40	4.36528	2.75119
ACVRL1	4.35968	1.06204
OSCAR	4.35968	1.21268
clodronic acid	4.35234	1.54415
PRKG1	4.35234	-0.078326
triclosan	4.34797	1.50756
CYP3A	4.33288	2.44949
PSEN2	4.32475	-1.15112
ANGPT2	4.30693	2.49477
tetrachlorodibenzodioxin	4.2878	-0.861011
RNASEH2B	4.28456	N/A
IgG	4.27992	1.65368
ADIPOQ	4.27873	-1.32178
IFNLR1	4.26314	N/A
SB-431542	4.26185	-3.46591
L-methionine	4.25976	-0.0227685
TET2	4.25901	3.16228
MIF	4.25901	4.10529
cobalt chloride	4.25823	3.51994
NUPR1	4.25662	-1.05247
trovafloxacin	4.24121	3.65655
YAP1	4.23627	1.91172
2-mercaptoacetate	4.23236	2.37635
IGF2BP1	4.23236	3.4641
MLX	4.23236	2.03795
YY1	4.22313	-0.125509
RCE1	4.2208	N/A
BRCA1	4.21073	1.823
SMAD4	4.1902	2.09329
LRP6	4.18429	-0.774627
NEDD9	4.18429	3.15296
NSD2	4.18429	1.85164
benzene	4.17406	-0.67251
trichloroethylene	4.17406	-1.22474
flutamide	4.17075	-1.70417
CFTR	4.17014	-1.38427
ALDH2	4.16783	0.961074
FAM3B	4.16783	N/A
lipoarabinomannan	4.16783	2.51661
wortmannin	4.16415	-3.87148
hydroxyflutamide	4.15421	-0.627037
isoquercitrin	4.15421	-3.13786
PLAGL1	4.15421	2.45358
Pam3-Cys-Ser-Lys4	4.15227	3.41647
PLK2	4.13634	2.13809
enterotoxin B	4.13556	3.45328
ICMT	4.13525	0
IRF1	4.12282	3.7748
lysophosphatidic acid	4.10357	3.79274
TAF4	4.10357	-3.08383
CIP2A	4.1012	-0.769686
Sn50 peptide	4.1012	-2.583
WT1	4.077	2.73902
PPIF	4.07674	0.685994
interferon beta-1a	4.06126	1.07538
HOXA9	4.05725	1.40712
NR4A1	4.05725	-0.0356088
phenobarbital	4.05634	-1.21888
aldosterone	4.04205	4.0106
methylmercury	4.03896	0
CpG oligonucleotide	4.03664	4.10667
ATP	4.03363	1.90531
ELAVL1	4.03363	3.06307
lisinopril	4.01972	-2.17279
Growth hormone	3.98788	-0.166658
MAPK7	3.98731	3.2922
HOXA3	3.98731	-1.6896
raloxifene	3.97795	1.32806
F2R	3.97328	3.64571
NBEAL2	3.96965	-1.12858
1-chloro-2-(2,2,2-trichloro-1-(4-chlorophenyl)ethyl)benzene	3.96965	0.985844
S1PR3	3.96965	2.39457
CD28	3.95478	0.831567
methamphetamine	3.93979	2.62416
RAF1	3.93636	2.74321
INHA	3.93564	-0.281994
eplerenone	3.91011	-2.91764
NPPB	3.91011	2.0491
FGF10	3.8997	2.35748
MAPKAPK2	3.8997	2.55263
daidzein	3.89295	1.18666
PTGS2	3.89269	4.07812
FOXA2	3.87953	-0.995639
heparin	3.86355	0.67185
SASH1	3.86355	2.88675
CTGF	3.8398	2.1755
mir-10	3.83746	-3.17125
DETA-NONOate	3.83564	0.197102
SERPINF1	3.8263	-1.17146
ENG	3.82448	0.648302
EP400	3.82448	3.05806
valsartan	3.82448	-3.26697
Hdac	3.81933	-1.1113
CXCL12	3.8127	4.64354
okadaic acid	3.8126	0.980583
GRN	3.80946	1.01127
ethidium	3.80946	-2.23607
Ren2	3.80946	1.67317
Fe2+	3.7999	0.787562
n-nitrosomethylbenzylamine	3.79364	N/A
BMP6	3.79143	1.22903
CAMP	3.79143	3.31095
Nfat (family)	3.79143	4.38805
SPDEF	3.78766	-3.3445
ADRA1D	3.77364	N/A
NFYA	3.75772	2.11948
anisomycin	3.75749	0.601082
sodium arsenite	3.75749	1.56556
SELP	3.73857	2.5
HDL	3.71412	-1.1572
lipid A	3.71412	4.21356
N-formyl-Met-Leu-Phe	3.71412	0.0710998
CAV1	3.71379	2.17401
entinostat	3.71216	1.24597
NR1H2	3.71057	-1.3207
dinoprost	3.70887	2.70735
VTN	3.7063	2.04791
ID3	3.70347	-0.141478
GATA6	3.69379	0.183983
CAT	3.69002	-1.77775
deoxycholate	3.69002	1.35709
MTORC1	3.69002	0.464606
ZBTB20	3.69002	-2.4004
NFIX	3.68663	-0.877407
IFNA2	3.68609	5.85247
DPP4	3.67577	0.642836
NCF1	3.67577	2.72809
RNASEH2A	3.65764	N/A
1,1-bis(3'-indolyl)-1-(4-trifluoromethyl-phenyl)methane	3.65617	1.80288
Ccl6	3.65617	2.6295
GUSB	3.65617	N/A
NFYB	3.65205	2.12861
RUNX1	3.64672	0.699394
Tnf (family)	3.6387	4.90066
hydrocortisone	3.63306	-0.838084
streptozocin	3.62525	2.40478
CLEC11A	3.6206	1.72328
ATPase	3.61052	-0.447214
HEPH	3.61052	N/A
IntegrinÎ±	3.61052	-2.23607
FOXA3	3.60492	-2.21359
nitrofen	3.60492	-1.73925
HNF4Î± dimer	3.60287	-0.795152
PTPRE	3.60287	1
xanthine	3.60287	2.40093
MAP3K7	3.59831	1.76986
PIK3CA	3.59078	1.28576
KLF4	3.58191	3.54929
Ap1	3.58134	3.75854
PARP1	3.57268	2.40876
REL	3.57051	2.36474
miR-320b (and other miRNAs w/seed AAAGCUG)	3.56475	0.306002
SNED1	3.56475	N/A
IL1R1	3.56264	1.40452
USF2	3.56264	0.0177964
ZNF106	3.56027	-2.06474
CSF1R	3.55691	2.14674
SU6656	3.55691	-1.67836
tyrphostin AG 1478	3.55166	-4.24857
FADD	3.54865	1.1434
ATF3	3.52968	-0.0704975
benzyloxycarbonyl-Leu-Leu-Leu aldehyde	3.52473	1.04088
NGF	3.51579	1.82638
BMPER	3.50516	-2.05718
FZD9	3.50516	3.12995
let-7	3.50199	-3.8938
PC-SPES	3.50114	N/A
ASXL1	3.49873	1.21268
HOXC6	3.49873	1.91377
USF1	3.49087	-0.0561391
3-deazaneplanocin	3.48879	3.04801
diphenyleneiodonium	3.48879	-2.84007
nitroprusside	3.48091	0.290297
chrysotile asbestos	3.48083	3.04135
IKZF1	3.47798	-1.14611
SPARC	3.47693	-0.190362
C5	3.46938	2.05471
testosterone	3.46721	-0.401782
epigallocatechin-gallate	3.46427	-3.15789
obeticholic acid	3.46066	-0.277363
benzyl isothiocyanate	3.4573	-2.26624
MALP-2s	3.4573	3.55774
trabectedin	3.4573	-1.02805
CYP7A1	3.44841	-1.37281
epicatechin gallate	3.44841	-1.19523
ERBB4	3.44821	-0.433918
discodermolide	3.44013	N/A
mir-210	3.41926	-3.73725
CD5	3.4157	0.0660819
NKX3-1	3.4157	N/A
PTPRJ	3.4157	2.06474
CYP1A2	3.41317	1.14708
CCL2	3.41037	1.58373
Ifn gamma	3.40894	3.89481
LDLR	3.40894	-1.16423
LRAT	3.40217	2.41404
LY-2510924	3.40217	-0.0387202
NELFB	3.40217	0
Map3k7	3.39509	3.7345
miR-29b-3p (and other miRNAs w/seed AGCACCA)	3.39509	-3.33914
MAP2K1/2	3.38645	3.1431
TGFBR1	3.38645	2.5644
IFNE	3.38518	2.37577
glutathione	3.36181	-0.813295
pravastatin	3.36181	-1.66797
ITGB3	3.35951	2.07308
ADRA1A	3.34353	N/A
imipramine blue	3.3349	-2.75519
SELPLG	3.3349	3.35659
Il3	3.32985	-0.679403
MYOD1	3.3265	0.753811
HIC1	3.31713	-0.0261399
miR-17-5p (and other miRNAs w/seed AAAGUGC)	3.31713	-3.62521
LIPE	3.30947	-1.15439
losartan potassium	3.30925	-2.14929
PAX3	3.29525	1.96974
JAG1	3.29068	1.91599
KRT17	3.29068	2.67261
SAFB	3.28644	-3.58323
E2F3	3.28536	1.8789
CGAS	3.28512	2.60801
N-ethyl-N-nitrosourea	3.28512	N/A
PURA	3.28512	1.01587
EIF3E	3.28355	-1.23494
LG100268	3.28355	1.77704
lysophosphatidylcholine	3.28355	1.54255
26s Proteasome	3.282	0.321833
12-(3-adamantan-1-yl-ureido) dodecanoic acid	3.28005	-0.515339
NR5A2	3.2551	0.233746
LGALS3	3.2551	1.04639
AREG	3.2551	2.97028
SLC9A3	3.2545	N/A
DOCK8	3.24932	3.4
KDM5B	3.24856	-1.84589
HDAC3	3.24465	-1.36648
2,4,5,2',4',5'-hexachlorobiphenyl	3.24465	-0.818822
DDX58	3.23945	3.23063
cuprizone	3.23384	1.33278
TREM2	3.23384	1.35294
GLIS2	3.23384	-3.14757
CX3CL1	3.22936	1.59666
heme	3.22936	1.55705
oleoyl-estrone	3.22936	-0.0836242
CD24	3.22533	2.20918
ADORA2B	3.22265	1.16775
fluvastatin	3.22265	-0.677583
PLAUR	3.22265	3.25039
acetaldehyde	3.2199	2.7199
ACKR1	3.2199	N/A
FGFR4	3.2199	N/A
hydroxypropyl-beta-cyclodextrin	3.2199	-0.75649
MED1	3.2135	1.78736
ATG7	3.2117	-1.24175
3-methylcholanthrene	3.2117	0.956263
APOA1	3.2117	-2.39868
Rock	3.2117	1.53226
CYBA	3.21145	0.522233
EIF4G2	3.21145	1.88982
S100P	3.21145	N/A
TAPI-1	3.21145	-1.91237
IFNAR2	3.20272	1.88982
RETN	3.20272	2.00752
TNFSF13B	3.2007	2.71013
arsenic trioxide	3.19354	2.31499
isoproterenol	3.19354	2.24801
E. coli lipopolysaccharide	3.16878	3.56062
Collagen type I	3.16878	2.308
diclofenac	3.16528	-1.49944
green tea polyphenol	3.16528	0.845818
mercuric chloride	3.16528	1.53216
MTTP	3.16528	-0.92
zoledronic acid	3.16528	-2.10656
IL11	3.16209	0.115965
aspirin	3.14876	-3.54034
TFAP2A	3.14876	-1.64548
SNAI1	3.14458	0.173102
TNFSF12	3.14341	4.41203
HDAC1	3.14248	-2.25391
beta-carotene	3.13464	-0.452267
T3-TR-RXR	3.13464	0.729325
miR-21-5p (and other miRNAs w/seed AGCUUAU)	3.12148	-3.2373
cyclophosphamide	3.12122	1.80541
IRAK4	3.12122	2.39069
bortezomib	3.11417	-1.47506
ALDH1A2	3.11249	-3.20831
CNOT7	3.11249	-1.98248
HOXC8	3.11249	0.541197
PIK3R1	3.10399	1.9293
quercetin	3.09644	-0.598981
BCR (complex)	3.08852	2.75727
BAX	3.08515	3.07929
NS-398	3.07974	-1.85433
HDAC4	3.07004	-1.19625
CYP51A1	3.06634	2.82843
PLA2G2D	3.06634	-2.4327
RLN2	3.06634	0.906487
vatalanib	3.06634	-1.97738
ADA	3.06574	-2.91162
HMGN1	3.06574	-1.66448
nitroarginine	3.06574	0.889322
TXNIP	3.06473	0.759394
Pdgf (complex)	3.06293	3.45635
GW501516	3.06136	0.886621
IFNA1/IFNA13	3.04244	3.75941
GLRX	3.03932	8.07806e-17
mir-185	3.03932	0.912565
ZFPM1	3.03916	N/A
amino acids	3.02719	-1.38694
HEXIM1	3.02719	-1.55515
SAA1	3.02719	2.09061
IFN Beta	3.02569	5.20617
TYROBP	3.00773	3.12995
CXCL2	3.00606	2.89588
DSP	3.00606	-2.17832
Cdc42	3.00523	1.40841
SETD2	3.00523	N/A
DNMT3A	3.00103	2.21392
KDR	2.99289	1.1767
phytohemagglutinin	2.9927	3.16735
creatine	2.99	-2.44949
MED30	2.99	N/A
SIRT2	2.99	-3.16228
SAMSN1	2.98377	4.01663
phosphate	2.98377	-1.41717
TCF	2.98377	0.641618
IL33	2.98052	1.3429
clofibrate	2.97917	2.95266
tacrolimus	2.97232	-1.81726
miR-34a-5p (and other miRNAs w/seed GGCAGUG)	2.96361	-3.24365
PTK2	2.96361	1.56338
miR-16-5p (and other miRNAs w/seed AGCAGCA)	2.95173	-2.55234
KEAP1	2.94521	-0.84022
PRKCZ	2.94521	1.1485
sodium orthovanadate	2.94521	2.36766
LMNA	2.94482	0.925899
1-methyl-4-phenyl-1,2,3,6-tetrahydropyridine	2.93894	3.49738
E2F2	2.93894	2.0381
N-acetylsphingosine	2.93289	1.79173
MSC	2.92725	0.142857
TBX2	2.92485	2.9093
tunicamycin	2.91632	2.21746
CPXM1	2.90702	2.23607
dibenzoylmethane	2.90702	-1.64345
F Actin	2.90702	-0.132453
PROK2	2.90702	1.28745
PSMD4	2.90702	2
ZMYND10	2.90702	-0.242536
ERBB3	2.90102	0.36153
MYOC	2.90102	2.73263
Pkc(s)	2.8999	3.72669
TGFB2	2.89958	1.09327
caffeic acid phenethyl ester	2.89744	-1.64315
Esrra	2.89683	-1.34108
UBE2I	2.88962	0.335403
proanthocyanidin derivative	2.88824	N/A
9,10-dimethyl-1,2-benzanthracene	2.88506	2.48035
CBL	2.88506	-1.9796
ARHGAP21	2.85785	2.66789
amiodarone	2.85402	0
ITGAV	2.85402	3.77958
E2F8	2.85	-0.688515
L1CAM	2.85	-0.112509
mimosine	2.85	0.970143
Ncoa6	2.85	0.6
TASP1	2.85	1.1094
TNNI3	2.85	2.64575
trestolone	2.85	N/A
tyrphostin AG 1296	2.85	-1.78208
bexarotene	2.84326	-0.534235
irbesartan	2.84002	-2.00832
lithocholic acid	2.84002	1.82078
black raspberry extract	2.83283	N/A
IL6R	2.83101	2.41073
NTRK2	2.81633	2.5877
ITGB1	2.81519	-0.269703
miR-146a-5p (and other miRNAs w/seed GAGAACU)	2.81519	-1.54179
desmopressin	2.81432	0.168897
ADRA1B	2.80686	N/A
Histone h3	2.80546	0.727607
NFAT (complex)	2.79873	1.51161
Ro41-5253	2.79873	-1.96195
ONECUT1	2.79853	-0.902608
erlotinib	2.79213	0.94585
miR-1-3p (and other miRNAs w/seed GGAAUGU)	2.78852	-2.73984
FBXW7	2.78791	-1.41461
ZEB2	2.78379	1.14816
beta-1,3-glucan	2.77726	0
CSF3R	2.77726	N/A
DNAJC3	2.77726	N/A
PECAM1	2.77726	-1.14065
pyruvic acid	2.77726	0.725866
SAT1	2.77726	-0.0403896
SMPD1	2.77726	-0.595021
zinc protoporphyrin IX	2.77726	-0.496292
caffeine	2.77316	-0.401952
chelerythrine	2.76946	-1.92916
CYB5R4	2.76946	-2.61819
DDX5	2.76946	1.29836
HOXD3	2.76946	3
MAP3K5	2.76946	2.90773
miR-296-5p (miRNAs w/seed GGGCCCC)	2.76946	-0.745225
CDK4	2.76935	-0.685994
antimycin A	2.75846	0.436436
IL11RA	2.75846	2.97044
LAMA5	2.75846	2.9673
THY1	2.75846	0.524146
peptidoglycan	2.75188	3.4337
RAC1	2.74529	3.53394
FLT1	2.73993	0.131306
GFI1	2.73983	-3.98871
CREM	2.73531	0.0260088
let-7a-5p (and other miRNAs w/seed GAGGUAG)	2.73531	-3.22539
leukotriene D4	2.73459	4.38595
oblimersen	2.73459	2.15387
FEV	2.73225	N/A
Hist1h1a	2.73225	0.377964
HIST1H1T	2.73225	0.377964
ALB	2.72912	1.08141
ITGB2	2.72912	0.636446
anakinra	2.72497	-2.60801
CTBP1	2.72497	-2.56138
STAT5B	2.72281	-0.57735
TLR7	2.72044	5.0441
VDR	2.7191	1.5458
LRP1	2.71099	-1.25737
nafenopin	2.71099	N/A
PGF	2.71099	2.62679
carbon monoxide	2.70948	-0.32681
WNT5A	2.70795	-0.0012426
HOXD10	2.68996	-0.518476
ITGA5	2.68631	2.88086
Salmonella enterica serotype abortus equi lipopolysaccharide	2.68198	3.94486
C3	2.67508	1.28643
ATP-gamma-S	2.67508	0.625786
NFATC2	2.67448	3.12512
CTSB	2.66626	1.41658
ECSIT	2.66626	2.36643
hemozoin	2.66626	3.34767
PLA2R1	2.66626	-1.34276
PML	2.66492	0.686274
IFI16	2.6564	2.03733
NCOA2	2.6564	0.582421
glutamine	2.65344	-1.52406
chloroquine	2.65279	-0.819287
DCN	2.65279	0.799871
SMAD1	2.65196	1.43338
TXN	2.65196	0.997468
N-Ac-Leu-Leu-norleucinal	2.65153	1.12779
imatinib	2.64877	-0.985728
MAPK8	2.64791	1.71372
E2f	2.64004	3.88782
TRAP1	2.6398	2.67261
ZBED6	2.6398	-2.86734
Cu2+	2.63848	1.18754
PBRM1	2.63848	N/A
PD 168393	2.63848	-0.157135
SCUBE3	2.63848	1.77666
MECP2	2.62848	1.39414
PPARGC1B	2.62666	-2.81474
CST5	2.62472	0.786889
diosgenin	2.6134	-3.28634
diethylstilbestrol	2.60723	1.14733
ABCA1	2.60631	0.695238
H2AFY	2.60631	-1.3155
LPL	2.60631	-0.234349
thymoquinone	2.60631	-0.0409273
POU5F1	2.59456	2.79897
CTLA4	2.58025	-2.84007
carbamylcholine	2.57555	1.79302
mitoxantrone	2.57555	0.229018
SUMO3	2.57555	-1.23718
FGF1	2.57356	0.225351
everolimus	2.57075	-1.3266
fluvoxamine	2.57075	N/A
ETS	2.56892	N/A
Fibrinogen	2.56892	2.3301
fluconazole	2.56892	-1.23091
HMGA2	2.56892	0.2
IGFBP5	2.56892	0.839181
PDGFC	2.56892	2.61102
AG490	2.5657	-1.18327
etoposide	2.55289	3.29781
trans-hydroxytamoxifen	2.54901	-0.165395
AIF1	2.54737	2.60709
clobetasol propionate	2.54737	-2.64575
STAR	2.54737	-2.44949
trientine	2.54737	-0.93949
VGLL3	2.54737	2.64575
carbonyl cyanide m-chlorophenyl hydrazone	2.54367	1.9959
iron	2.54367	-1.32542
FDFT1	2.53696	1.70561
ADRB1	2.53696	N/A
AKR1B1	2.53696	0.222188
CXCL3	2.53696	2.94705
NFIA	2.53696	-0.956183
NT5E	2.53696	-1.46261
PRDM1	2.5309	-3.5934
CD2	2.52657	2.43998
fasudil	2.52657	-2.23094
GATA1	2.52546	1.37999
FABP1	2.5249	0.81275
PADI2	2.5249	2.80365
epothilone B	2.5249	0
MDK	2.5249	1.93733
miR-503-5p (miRNAs w/seed AGCAGCG)	2.5249	-2.76776
Sod	2.5249	-1.88982
Z-551	2.5249	-1.99655
PRKCB	2.52286	1.74491
Fcer1	2.50732	3.14697
TNFRSF8	2.50732	0.932298
ferulic acid	2.50457	0.507673
mir-193	2.50457	-2.38348
phorbol 12,13-didecanoate	2.50457	-0.714938
PRKCI	2.50457	1.02105
RC3H1	2.50457	N/A
SUB1	2.50457	N/A
vinblastine	2.50457	2.36982
fatty acid	2.50066	0.704081
SOD2	2.50066	1.55735
thalidomide	2.50015	-1.31452
DICER1	2.49781	-1.23622
ACVR1	2.48909	-1.06749
OLR1	2.48909	3.0817
PROC	2.48909	-1.23976
SQSTM1	2.48909	2.53374
GDF2	2.48858	0.744047
KCNE3	2.48854	N/A
mir-29	2.48854	-1.73968
nocodazole	2.48465	0.257897
NOD2	2.48402	3.73294
3,4,5,3',4'-pentachlorobiphenyl	2.48241	1.78253
TGFA	2.48241	3.08254
GNA12	2.4821	2.087
IL18	2.47839	4.52383
ADORA2A	2.45966	1.46915
EBF1	2.45966	1.21407
AGTR1	2.4472	1.85164
GNB1	2.4472	N/A
histone deacetylase	2.4472	-1.02576
pimagedine	2.4472	-1.22885
TFEB	2.4472	3.42225
ACKR3	2.44235	2.02732
Mt1	2.44235	-1.14065
SUPT16H	2.44235	N/A
adenosine	2.43892	1.37449
KLF5	2.43892	2.68782
16,16-dimethylprostaglandin E2	2.43716	1.2171
MED28	2.43716	-2.16768
miR-138-5p (miRNAs w/seed GCUGGUG)	2.43716	-0.845154
PPP1CA	2.43716	0.294118
QRFP	2.43716	0.398216
RBCK1	2.43716	2.23607
SCGB3A2	2.43716	-2.23607
zimelidine	2.43716	-1.34164
ZNF521	2.43716	-0.27735
reactive oxygen species	2.43033	3.30176
GAB2	2.42608	3.39945
SYVN1	2.41415	2.00836
Y 27632	2.41168	-2.85766
HBEGF	2.40724	2.84626
tert-butyl-hydroquinone	2.40589	2.98718
romidepsin	2.40417	1.09178
KLF6	2.39984	2.6556
LRPAP1	2.38576	1.81641
Mt2	2.38576	-1.29399
selenomethylselenocysteine	2.38576	-1.92916
E2F1	2.37096	3.34277
GTF2B	2.36833	N/A
NLRP12	2.36833	-0.660689
carbohydrate	2.35381	2.52982
methylnitronitrosoguanidine	2.35381	2.43967
S100A6	2.35381	0.57735
PRKCA	2.35223	2.60594
ADM2	2.33751	-0.516825
BCL2L11	2.33751	1.01707
PARP9	2.33751	2.98481
RHOJ	2.33751	N/A
ATF2	2.33697	3.14576
SOX2	2.33678	-1.65142
nitric oxide	2.33206	2.77442
4-hydroxytamoxifen	2.33177	0.551831
eflornithine	2.32545	0.388338
IRS2	2.32545	0.969223
PCGEM1	2.32545	2.30731
TBK1	2.32301	2.70225
IL27	2.32139	4.09028
AMBP	2.31646	-1.06715
astressin 2B	2.31646	-0.548387
KLB	2.31646	-0.2
(5-(4-N-methyl-N(2-pyridyl)amino)ethoxy)benzyl thiazolidine-2,4-dione	2.31646	0.57735
AEBP1	2.31646	0.241834
CERS2	2.31646	-1.66448
HBB	2.31646	N/A
ITGA4	2.31646	-0.756873
KDM8	2.31646	0.816497
LINC01139	2.31646	2.44949
midostaurin	2.31646	-1.45204
PPBP	2.31646	0.80829
Shc	2.31646	0.242536
SMOC2	2.31646	0.816497
SU1498	2.31646	-1.66448
Trolox C	2.31646	-0.5547
F3	2.31536	2.88731
HIPK2	2.31536	-0.863613
IFNL1	2.31511	4.55443
AGER	2.31405	2.32009
VIPR1	2.30225	2.80976
CXCR2	2.30225	0.050702
DDR1	2.30225	0.727607
E2F7	2.30225	N/A
OSBPL8	2.30225	-1.62221
TOR1A	2.30225	N/A
ADCYAP1	2.30111	0.849025
TMEM173	2.2936	3.59211
ICAM1	2.2936	2.76014
Am 580	2.29016	2.42398
Fgf	2.29016	2.37712
Rar	2.29016	0.341882
BCO1	2.28885	N/A
HIF3A	2.28885	-0.578947
LAMA2	2.28885	0.113961
NDUFA13	2.28885	-1.30842
ORMDL3	2.28885	2.40757
selumetinib	2.28885	0.463389
cephaloridine	2.28579	3.14929
CHI3L1	2.28405	N/A
CX3CR1	2.28405	0.854242
ATN1	2.27881	N/A
omeprazole	2.27017	-2.15545
SLC13A1	2.26424	-0.377964
ALDH3A2	2.26069	N/A
BLVRA	2.26069	1
BRD8	2.26069	N/A
CH-223191	2.26069	1.9868
ENTPD5	2.26069	1.9799
G6PC3	2.26069	1.9868
Ho	2.26069	0
P110	2.26069	N/A
SRSF6	2.26069	-0.152499
IL7	2.25732	1.86251
SBDS	2.25493	N/A
EOMES	2.24488	-1.31268
GNB2	2.24377	N/A
NQO1	2.24377	-0.507093
propofol	2.24377	0.216574
TSC1	2.24377	-0.950445
GW 4064	2.24174	-0.753624
ciglitazone	2.23992	-1.5464
BCL6	2.23903	-1.57666
CD 437	2.23903	2.34201
STAT5A	2.23563	0.296143
apigenin	2.23461	-1.67211
NR0B2	2.23461	1.44502
EGLN1	2.23439	-1.24356
GCG	2.23106	1.24019
Mapk	2.23103	2.44522
VIP	2.23103	-1.47867
miR-30a-3p (and other miRNAs w/seed UUUCAGU)	2.21786	-2.0335
PDGF-DD	2.21786	0.632456
FOXP3	2.21779	-0.0716115
RBL2	2.21779	-1.10307
TLR2	2.21516	2.63377
ANXA1	2.21298	0.821669
butylated hydroxyanisol	2.21298	0.0111089
daunorubicin	2.21298	1.39623
Focal adhesion kinase	2.21298	0.55234
GNAI2	2.21298	1.34054
MLXIPL	2.21298	1.97543
JAK	2.20987	1.73205
ARNT2	2.1936	1.63299
Collagen(s)	2.18531	0.248421
mir-181	2.18531	-2.82837
RBM5	2.18531	-0.423527
GW9662	2.1826	-1.46433
RGS10	2.16792	N/A
albendazole	2.16605	N/A
alprenolol	2.16605	N/A
bis(4-hydroxycinnamoyl)methane	2.16605	N/A
CIAO1	2.16605	N/A
CSNK1E	2.16605	N/A
E64	2.16605	N/A
ELOA	2.16605	N/A
GLUD1	2.16605	N/A
glutathione diethyl ester	2.16605	N/A
HDGF	2.16605	N/A
HSPA4	2.16605	N/A
KRT5	2.16605	N/A
maraviroc	2.16605	N/A
MATK	2.16605	N/A
methylamphotericin B	2.16605	N/A
miR-615-3p (miRNAs w/seed CCGAGCC)	2.16605	N/A
natamycin	2.16605	N/A
OLA1	2.16605	N/A
oxonic acid	2.16605	N/A
phenylacetic acid	2.16605	N/A
potassium channel	2.16605	N/A
riociguat	2.16605	N/A
SDHA	2.16605	N/A
STAT3 inhibitor XIII	2.16605	N/A
TFIIH	2.16605	N/A
trapidil	2.16605	N/A
4-methylnitrosoamino-1-(3-pyridinyl)-1-butanone	2.16231	2.67709
PKM	2.16231	1.55194
NKX2-1	2.15838	-1.01015
11,12-epoxyeicosatrienoic acid	2.15693	0.800198
calyculin A	2.15693	-1.066
Klra7 (includes others)	2.15693	2.39766
Rxr	2.15152	6.13226e-17
SOX1	2.15077	-3.54475
HDAC5	2.14892	-1.50756
hydroxyurea	2.14533	2.09601
NRG2	2.14477	N/A
ACTL6A	2.13719	0.632456
ASAH1	2.13719	1.46059
OSMR	2.13719	1.50966
ozone	2.13719	3.22243
PD 123319	2.13719	1.04243
CP-55940	2.12597	1.09109
NR1D1	2.12597	-1.02899
PDLIM2	2.12464	-1.22628
3-deoxy-2-octulosonic acid(2)-lipid A	2.10415	2.12132
AGPAT2	2.10415	-0.787562
batimastat	2.10415	2.13767
GIP	2.10415	2.78592
MYCBP2	2.10415	-1.41421
NO 1886	2.10415	-0.707107
p85 (pik3r)	2.10415	0.174078
Smad2/3-Smad4	2.10415	2.15914
TF	2.10415	0.886752
ZC3H14	2.10415	1.41421
phenethyl isothiocyanate	2.10238	-1.04093
amphetamine	2.10084	1.64072
ribavirin	2.10008	2.89246
baicalein	2.10008	-1.9364
BCL3	2.10008	-1.1585
maslinic acid	2.09038	-1.34164
8-bromo-cAMP	2.08949	0.598116
TBL1XR1	2.08496	N/A
ABCC1	2.08496	2.23607
CD5L	2.08496	1.49137
cholestyramine	2.08496	N/A
DEPTOR	2.08496	-2.23607
GPAT3	2.08496	1.34164
MEDAG	2.08496	1.34164
oleoylethanolamide	2.08496	0.0743294
PBX2	2.08496	N/A
PKP2	2.08496	-1.30842
rhodamine 6G	2.08496	-2.22378
SDC2	2.08496	1.06749
sphingosylphosphocholine	2.08496	1.38675
C3AR1	2.08207	0.953821
herbimycin	2.08207	-2.0196
Pam3-Cys	2.08207	2.58832
caspase	2.08121	3.12995
DLL4	2.08121	0.822981
Fc gamma receptor	2.08121	1.71389
SRSF1	2.08121	-1.29181
PLG	2.07308	3.94106
Rb	2.07308	-3.58219
FST	2.07014	-0.742851
IRF5	2.06664	4.01696
5-hydroxytryptamine	2.06664	3.27675
linoleic acid	2.06664	2.47864
MDM2	2.06664	1.33296
mir-130	2.06478	-0.290284
ADP	2.06478	-0.146911
farnesyl pyrophosphate	2.06478	1.96931
LAMC1	2.06478	-1.33062
N(2)-(gamma-D-glutamyl)-meso-2,2'-diaminopimelic acid	2.06478	1.91237
nystatin	2.06478	2
onapristone	2.06478	-1.91404
PI-103	2.06478	0.188877
Ptprd	2.06478	-2.64575
spermidine	2.06478	-0.341882
spermine	2.06478	-0.335377
SPHK2	2.06478	1.03234
SRSF3	2.06478	0.897657
deoxycorticosterone acetate	2.06343	2.14366
MIR17HG	2.06343	-1.38219
NTRK1	2.06343	0.494743
PDGF-AA	2.06343	2.6474
FOXA1	2.06245	-4.06156
MAP2K4	2.05972	3.1843
SCD	2.05972	-1.19846
E2F6	2.05958	-3.05085
MEF2D	2.05958	0.117557
RET	2.05726	1.07288
3,5-diiodothyronine	2.04959	0.896258
ABCA4	2.04959	-0.27735
albuterol	2.04959	-0.816497
coal tar	2.04959	0
Collagen Alpha1	2.04959	2.18601
EPHB1	2.04959	2.42487
meloxicam	2.04959	-0.652263
S100A12	2.04959	1.45521
ST3-Hel2A-2	2.04959	1.63946
T 0070907	2.04959	0.80829
TEAD2	2.04959	N/A
VEGFC	2.04959	1.70941
zeaxanthin	2.04959	-1.63299
IRF4	2.04208	-2.74982
phorbol 12,13-dibutyrate	2.04191	0.851069
PTGS1	2.04191	0.145521
tempol	2.04191	-3.57528
chenodeoxycholic acid	2.01895	1.47671
GMNN	2.01895	-3.67423
celecoxib	2.01569	-1.563
pregnenolone carbonitrile	2.01446	-1.31637
SB 216763	2.01446	3.07268
SFTPA1	2.00786	-2.3353
budesonide	2.00786	0.668153
spironolactone	2.00786	-1.97152
PBX1	2.00067	N/A
REN	2.00067	2.39249
TAB1	2.00067	-1.94257
isotretinoin	1.9979	2.60076
BTNL2	1.9979	3.55465
PRKCE	1.9979	2.49738
2-methoxyestradiol	1.99572	-0.685747
carrageenan	1.99572	3.68187
mir-133	1.99572	-1.70257
PIK3CG	1.99572	1.29048
retinoid	1.99572	0.164399
SPHK1	1.99572	1.25401
BCOR	1.99272	N/A
CYP2J2	1.99272	-0.416532
H2AFZ	1.99272	N/A
linalool	1.99272	1.17092
nickel	1.99272	2.13767
SLC2A4	1.99272	1.02554
tamibarotene	1.99272	1.79476
baicalin	1.98359	1.79259
silibinin	1.98221	-1.96212
FHL2	1.97659	0.946883
miR-133a-3p (and other miRNAs w/seed UUGGUCC)	1.97659	-1.80362
MSTN	1.97659	2.01886
C5AR1	1.97399	3.22265
PIN1	1.97399	1.60251
fingolimod	1.97366	-2.22623
TRAF3	1.96325	-2.71122
miR-291a-3p (and other miRNAs w/seed AAGUGCU)	1.96325	-3.40484
MAPK9	1.96198	2.01841
CORT	1.95775	-3.44036
F7	1.95775	1.59616
hymecromone	1.95775	-1.89625
TNFRSF1B	1.94568	2.84932
IDH1	1.92842	1.34164
mevalonic acid	1.92842	1.83145
Ctbp	1.92671	-0.970143
glycine	1.92671	1.47959
KLK4	1.92671	N/A
propionic acid	1.92671	1.36364
S-(2,3-bispalmitoyloxypropyl)-cysteine-GDPKHPKSF	1.92671	2.15666
superoxide	1.92671	1.67332
TAF1	1.92671	N/A
epinephrine	1.92516	1.72685
ERN1	1.9219	0.522672
amitriptyline	1.92103	-1.97551
BAG1	1.92103	2.37374
CXCL10	1.92103	2.40682
E2F5	1.92103	N/A
FXR ligand-FXR-Retinoic acid-RXRÎ±	1.92103	0.347621
GRP	1.92103	2.28178
kaempferol	1.92103	-1.2898
NFIC	1.92103	0.185695
PCYT1A	1.92103	3.16228
PF4	1.92103	2.23578
SLPI	1.92103	-2.26274
PTHLH	1.91452	0.428126
CALCA	1.913	-0.436451
CCR5	1.90884	2.50491
EIF2AK3	1.90292	0.265285
calphostin C	1.89745	-2.14696
IRF2	1.89745	-0.44186
Collagen type II	1.89648	-1.12724
ursolic acid	1.89157	-1.37281
gemcitabine	1.88795	0.582668
2,3,4,7,8-pentachlorodibenzofuran	1.88708	1.14953
mycophenolic acid	1.88247	2.73434
ALOX15	1.87353	3.27028
EIF2AK4	1.87353	-0.0436436
NPC2	1.87353	-1.14681
targinine	1.87353	1.19171
10-nitrooleate	1.86841	-0.870388
15(S)-HETE	1.86841	-0.0720884
APBB1	1.86841	1.73422
calpeptin	1.86841	0.377964
CLCN5	1.86841	-0.185957
CRKL	1.86841	1.91237
INSIG2	1.86841	0.925899
MIR101	1.86841	-0.928477
miR-143-3p (and other miRNAs w/seed GAGAUGA)	1.86841	-2.5858
miR-223-3p (miRNAs w/seed GUCAGUU)	1.86841	-1.76394
Mn(III)-tetrakis-(4-benzoic acid) porphyrin	1.86841	-0.239046
SPTLC2	1.86841	-0.956183
A23187	1.86369	4.19053
emricasan	1.85441	-1.96865
12-hydroxyeicosatetraenoic acid	1.85441	0.593732
Ap2 alpha	1.85441	N/A
AP2M1	1.85441	N/A
AR-A014418	1.85441	-0.685994
BCL2L12	1.85441	-2
bergamottin	1.85441	-1.96865
CCAR1	1.85441	1.98248
CDH13	1.85441	N/A
CIMO	1.85441	-2
copper sulfate	1.85441	0.468521
DDX3X	1.85441	0.0678844
DES	1.85441	-1.9799
DYNLL1	1.85441	N/A
EFEMP2	1.85441	N/A
eprosartan	1.85441	-2
ERBIN	1.85441	-0.0678844
ERCC1	1.85441	-1.06749
FES	1.85441	N/A
histidinol	1.85441	N/A
ITGA11	1.85441	1.06749
ITPR2	1.85441	0
itraconazole	1.85441	-1.94145
LDL-cholesterol	1.85441	0
MB	1.85441	0
miR-219a-5p (and other miRNAs w/seed GAUUGUC)	1.85441	-1.98248
MMP13	1.85441	2
Msx3	1.85441	1
PIWIL4	1.85441	2
PPM1B	1.85441	2
PPP1R14B	1.85441	1.13137
RBX1	1.85441	2
RDH8	1.85441	N/A
thioinosine	1.85441	N/A
VEGFD	1.85441	1.92494
VIPAS39	1.85441	2
warfarin	1.85441	-1.13137
DYRK1A	1.8428	-1.85695
K-252	1.8428	0.396059
NADPH oxidase	1.8428	2.81272
EWSR1	1.84192	2.88743
SSRP1	1.84192	N/A
taurine	1.84192	-0.0932505
TIMP1	1.84192	1.73205
TNC	1.84192	1.39054
EZH2	1.83341	1.09334
ANXA7	1.83089	-0.218218
YBX1	1.83089	1.65115
chlorcyclizine	1.82372	-1.63299
Ck2	1.82372	-0.242536
CLEC1B	1.82372	1.40841
DBI	1.82372	-2.23607
ebselen	1.82372	-1.45521
FOXD3	1.82372	-0.33258
hydroquinone	1.82372	1.43208
mir-148	1.82372	-1.1281
mir-373	1.82372	-0.777554
PPP3CB	1.82372	-0.209541
PRAME	1.82372	-0.254457
RGS2	1.82372	2.44949
steroid	1.82134	-0.213201
TLR5	1.82134	3.26599
NEUROG1	1.82082	-2.23607
tributyrin	1.82082	3.58979
topotecan	1.81977	-0.0972234
mitomycin C	1.81232	2.30227
TFAP2C	1.81232	-1.19322
dalfampridine	1.80872	3.20831
panobinostat	1.80872	-1.89085
PAX5	1.80872	-0.978084
STK40	1.80872	N/A
C7	1.80609	1
C8	1.80609	1
C9	1.80609	1
4-nonylphenol	1.80609	0.447214
6-aminonicotinamide	1.80609	-1.43208
BRMS1	1.80609	-0.152499
CDKN2B	1.80609	-0.390567
cytidylyl-3'-5'-guanosine	1.80609	1.9799
cytochalasin B	1.80609	-0.57735
desoxycorticosterone	1.80609	1.98932
hexarelin	1.80609	-0.390567
miR-150-5p (and other miRNAs w/seed CUCCCAA)	1.80609	-0.492366
miR-193a-3p (and other miRNAs w/seed ACUGGCC)	1.80609	-1.43396
NEK6	1.80609	1.34164
NELFA	1.80609	N/A
PSMB9	1.80609	0.650945
RALBP1	1.80609	1
tiron	1.80609	-0.447214
CSHL1	1.80571	0.0450345
IL12B	1.80571	3.37711
luteolin	1.80571	-0.59795
thioctic acid	1.80571	-2.91652
candesartan	1.80205	-3.78189
TRAF2	1.80162	0.65087
chromium	1.80141	-1.1068
CUX1	1.80141	-1.19452
NOTCH3	1.80141	2.17761
LTBR	1.79995	-0.720511
GnRH analog	1.79311	2.46243
linolenic acid	1.78939	-0.0949158
TAF4B	1.78939	2.15555
SOX11	1.78664	-0.618853
SOX3	1.78664	-3.54475
cocaine	1.78177	2.8877
LHX1	1.76841	0.0588235
alpha-tocopherol succinate	1.76688	-0.850569
CDK5R1	1.76688	0.816497
CHEK1	1.76688	0.860972
fumonisin B1	1.76688	0.538672
leuprolide	1.76688	-0.772674
MST1R	1.76688	1.69775
NAB2	1.76688	-2.71454
RARRES2	1.76688	-0.113961
thioridazine	1.76688	-1.13389
MAPK3	1.75918	1.66902
4-(2-aminoethyl)benzenesulfonylfluoride	1.75494	0.181369
betulinic acid	1.75494	-1.43396
IL17RA	1.75494	2.71429
naringenin	1.75494	-0.647059
NGFR	1.75494	-1.14698
PDPK1	1.75494	-0.91334
TIRAP	1.75494	2.08494
GLI2	1.74907	1.32523
miR-122-5p (miRNAs w/seed GGAGUGU)	1.747	-2.81629
SOX9	1.747	-0.682898
minocycline	1.73611	-2.12845
PDGFB	1.73611	2.60716
NDRG1	1.73315	-1.34732
rotenone	1.72679	-2.38667
TBX21	1.72679	1.88375
IL12 (family)	1.72096	1.85627
GAST	1.72072	1.76875
APR-246	1.72023	N/A
DACH1	1.72023	-1.04805
PP1	1.72023	-1.84173
3-nitropropionic acid	1.71938	2.61116
NFKBIB	1.71938	-0.792118
Hsp70	1.71377	-0.247841
NFIB	1.71377	N/A
lithium chloride	1.71241	0.126378
NCOR2	1.71217	0.492366
VitaminD3-VDR-RXR	1.71217	2.05582
uric acid	1.71118	1.58006
9Z,11E-octadecadienoic acid	1.70551	0.426401
evodiamine	1.70551	-2.13767
mir-33	1.70551	-2.35339
pifithrin alpha	1.70551	-1.12148
pregna-4,17-diene-3,16-dione	1.70551	-1.63195
SEMA7A	1.70551	3
TRPS1	1.70551	0.112509
lactacystin	1.70158	1.35867
14,15-epoxyeicosatrienoic acid	1.69483	1.19523
4-nitroquinoline-1-oxide	1.69483	2.44949
ACACB	1.69483	0.640184
acadesine	1.69483	-0.896258
allyl sulfide	1.69483	-1.22255
AQP1	1.69483	-0.377964
Mir122a,b	1.69483	-1.94426
NTF4	1.69483	2.59554
CLDN7	1.69126	0
HDAC2	1.68587	-1.6955
CNR1	1.68309	2.42977
ceramide	1.66745	-0.980196
choline fenofibrate	1.66745	-1.14463
CTSS	1.66745	1.63299
DRD2	1.66745	0.440064
PRKDC	1.66745	1.50111
THBS4	1.66745	0.848528
H89	1.66063	-1.48215
2-deoxyglucose	1.65105	-0.22192
DKK1	1.65105	-1.67748
FLI1	1.65105	-0.470258
POLR2A	1.65105	N/A
IFRD1	1.64418	0.266207
KNG1	1.64418	1.97613
LCK	1.64418	1.65968
linsidomine	1.64418	1.46365
TNFSF14	1.64418	2.79038
THRA	1.6416	-0.685994
PLAG1	1.64082	2.18282
telmisartan	1.64082	0.112987
CXCL8	1.63976	2.5138
RBL1	1.63976	-2.72394
EPO	1.63443	0.084534
NFATC1	1.6332	1.49855
GAPDH	1.6309	-1.86505
acetoacetic acid	1.6306	N/A
CYP8B1	1.6306	N/A
2-(3-hydroxypropoxy)calcitriol	1.6306	N/A
AKR1C3	1.6306	N/A
ammonia	1.6306	N/A
ARSA	1.6306	N/A
ATP8B1	1.6306	N/A
benoxaprofen	1.6306	N/A
carboxyamido-triazole	1.6306	N/A
Casein	1.6306	N/A
CKS2	1.6306	N/A
CMA1	1.6306	N/A
CTNNAL1	1.6306	N/A
DNAJB4	1.6306	N/A
elcatonin	1.6306	N/A
ELL2	1.6306	N/A
FBLN2	1.6306	N/A
GJB6	1.6306	N/A
griseofulvin	1.6306	N/A
GZMB	1.6306	N/A
idelalisib	1.6306	N/A
iodixanol	1.6306	N/A
KLK6	1.6306	N/A
L-alanine	1.6306	N/A
L-asparagine	1.6306	N/A
LRRC8C	1.6306	N/A
mir-138	1.6306	N/A
MOGAT1	1.6306	N/A
N-butyldeoxynojirimycin	1.6306	N/A
nitrendipine	1.6306	N/A
NXF1	1.6306	N/A
opioid	1.6306	N/A
Pb2+	1.6306	N/A
PDGFRbeta-recognizing cyclic peptide	1.6306	N/A
platelet activating factor-C16	1.6306	N/A
polymethyl methacrylate	1.6306	N/A
PPP2R5B	1.6306	N/A
salicylamide	1.6306	N/A
Sapk	1.6306	N/A
SERPINH1	1.6306	N/A
Slfn1	1.6306	N/A
sucralose	1.6306	N/A
TBX20	1.6306	N/A
tesaglitazar	1.6306	N/A
TEX11	1.6306	N/A
TR-RXR	1.6306	N/A
TXN2	1.6306	N/A
tyrosine kinase	1.6306	N/A
VCAM1	1.6306	N/A
VLDL	1.6306	N/A
TREX1	1.62965	N/A
[D-Ala2,N-Me-Phe4,Gly5-ol]-Enkephalin	1.62965	0.227411
CCL3L3	1.62965	N/A
CSF2RA	1.62965	0.57735
FOXG1	1.62965	-0.238442
GFAP	1.62965	N/A
MBTPS1	1.62965	0
nelfinavir	1.62965	-0.928477
perhexiline	1.62965	-1.63299
SGPL1	1.62965	-1.69775
TLE1	1.62965	N/A
Ca2+	1.62788	3.86623
alvocidib	1.62469	-2.28952
CARM1	1.62469	2.11545
propranolol	1.62469	-1.68439
SUMO2	1.62469	-0.652753
tetraethylammonium	1.62469	-0.262111
RARG	1.62368	0.973645
BAPTA-AM	1.62368	-2.62108
NME1	1.62368	-2.10603
Ro31-8220	1.62368	-2.22404
U73122	1.62368	-1.29557
PAX7	1.62319	0.737309
AURKB	1.62227	-0.213201
C1QA	1.62227	-0.557086
chitin	1.62227	1.9796
dacinostat	1.62227	0.861158
ETV1	1.62227	1.03975
F10	1.62227	0.0966736
finasteride	1.62227	1.91237
puromycin	1.62227	0.646997
Ras homolog	1.62227	1.07833
SENP1	1.62227	-0.27735
3,3'-diindolylmethane	1.60734	1.58905
EGR2	1.59437	0.349822
ESRRA	1.58611	-0.0231558
SIM1	1.58258	1.94145
MAP3K3	1.57944	2.2
MECOM	1.57944	1.446
methyl-beta-cyclodextrin	1.57944	-0.640184
stearic acid	1.57944	1.76868
TWIST2	1.57944	2.00778
2-hydroxy-1-naphthylaldehyde isonicotinoyl hydrazone	1.57788	0.351123
ADCY7	1.57788	-0.447214
ATP7A	1.57788	N/A
BCO2	1.57788	N/A
bile salt	1.57788	0.2
candesartan cilexetil	1.57788	0.447214
EEF1A2	1.57788	-2.23607
ETV6	1.57788	-2.23607
FFAR1	1.57788	-0.152499
FRMD6	1.57788	1
GFPT1	1.57788	-0.5547
HOXB5	1.57788	0.447214
Kallikrein	1.57788	-1.4771
MAPKAP1	1.57788	2.2188
mesalamine	1.57788	0.6
PRDM16	1.57788	0.152499
quinidine	1.57788	1.34164
RFWD2	1.57788	N/A
TAF5	1.57788	N/A
ascorbic acid	1.57673	0.269175
CpG ODN 1826	1.57673	2.7947
SMO	1.57673	-1.23091
MAP2K6	1.55874	1.02848
BAP1	1.55669	-1.94878
C6	1.55669	1.97438
AFF1	1.55669	N/A
ASCL2	1.55669	N/A
DAB2IP	1.55669	-0.862699
dacarbazine	1.55669	1
EGR4	1.55669	0.848528
ERFE	1.55669	1.94766
ganetespib	1.55669	N/A
Hmgb2 (includes others)	1.55669	N/A
IGFBP4	1.55669	-1.16518
KDM3A	1.55669	1.98248
miR-338-3p (miRNAs w/seed CCAGCAU)	1.55669	-2
miR-542-3p (miRNAs w/seed GUGACAG)	1.55669	1.96946
murabutide	1.55669	1
Muscarinic cholinergic receptor	1.55669	1.70247
N,N-dimethylarginine	1.55669	N/A
nicorandil	1.55669	N/A
NPAS2	1.55669	N/A
PDE6B	1.55669	N/A
PPM1A	1.55669	2
PPP5C	1.55669	0
SLC19A1	1.55669	N/A
SNW1	1.55669	N/A
sulfinosine	1.55669	-0.854242
taurodeoxycholic acid	1.55669	-0.762493
TEAD	1.55669	2
TMPO	1.55669	2
TSPO	1.55669	N/A
STAT2	1.55437	1.59471
Gm-csf	1.55437	1.64634
Ige	1.55437	1.47664
RTN4	1.55437	-0.409616
ELOVL5	1.5543	-0.95976
bryostatin 1	1.5543	0.696855
indican	1.5543	-0.605839
L-arginine	1.5543	-0.115857
miR-92a-3p (and other miRNAs w/seed AUUGCAC)	1.5543	-3.06169
PTH1R	1.5543	1.57112
SFN	1.5543	1
THBS1	1.5543	2.39795
5-azacytidine	1.5517	2.9468
metformin	1.54804	-1.25168
AKT2	1.54505	0.696974
bicuculline	1.54505	2.87895
EBI3	1.54505	1.62151
fish oils	1.54505	-3.16228
IFN type 1	1.54505	2.66218
FGF7	1.5413	2.42815
NCOA3	1.5413	1.97182
PPP3CA	1.5413	1.96116
glucocorticoid	1.54089	-0.130493
ALOX5	1.54059	0.967702
GJA1	1.54059	0.248421
IFIH1	1.54059	0.574183
MMP14	1.54059	-1.75641
SFRP1	1.54059	-1.4242
C5	1.54033	3.31258
acyclic retinoid	1.54033	-2.05495
CDK1	1.54033	-0.5547
DNAJB6	1.54033	-1.07128
GDF15	1.54033	1.45359
glutamyl-Se-methylselenocysteine	1.54033	-1.13389
ITGB6	1.54033	1.59076
LBP	1.54033	0.896258
mir-9	1.54033	-1.49827
MXI1	1.54033	-1.94666
oxysterol	1.54033	1.27581
PDGFRA	1.54033	2.19977
PPP2R5C	1.54033	-1.88982
rofecoxib	1.54033	-0.244851
TNK1	1.54033	2.42536
SKIL	1.53815	0.605632
cilostazol	1.53469	-1.39926
lipoxin A4	1.53469	-0.392792
pentoxifylline	1.53469	-2.12499
SAA	1.53469	2.81501
RUVBL1	1.53437	-0.57735
IKBKE	1.52452	1.8398
Sb202190	1.52293	-2.18224
POU2F2	1.51952	1.2156
STAT5a/b	1.51952	2.03878
nicotine	1.5168	2.39479
NRIP1	1.50854	0.67146
EIF2AK2	1.49849	3.09845
zymosan	1.49352	2.56154
HSP90B1	1.49352	0.443533
IL32	1.49352	1.23061
miR-145-5p (and other miRNAs w/seed UCCAGUU)	1.49352	-2.64981
EBF2	1.49093	2.63493
FOXC1	1.49093	2.2
JINK1/2	1.49093	0.727607
LGR5	1.49093	-0.185695
miR-103-3p (and other miRNAs w/seed GCAGCAU)	1.49093	-1.25446
miR-293-5p (and other miRNAs w/seed CUCAAAC)	1.49093	-0.562544
probucol	1.49093	-0.0588235
SIN3B	1.49093	N/A
SMARCE1	1.49093	-0.377964
EGLN	1.48715	-2.0757
KIT	1.48715	N/A
PI3K (family)	1.48033	3.00833
CDK9	1.4797	2.60801
IL2RG	1.4797	0.648358
NFKB2	1.47767	0.180544
SOCS3	1.47762	-2.2151
paraquat	1.477	1.44392
ADM	1.46737	0.0494154
PAF1	1.46737	1.80739
SRC (family)	1.46737	2.89427
BTG2	1.46338	-2.59336
ELF1	1.46338	-0.713714
NODAL	1.46338	-1
SPRY1	1.46338	-1.9799
UCN-01	1.46338	-1.02606
Cdk	1.46097	N/A
MVP	1.46097	0.762493
5,8,11,14-eicosatetraynoic acid	1.46097	0.2
ALDH1A1	1.46097	0.764706
Betacatenin/TCF	1.46097	2.44949
Cd2+	1.46097	1.06749
cetuximab	1.46097	-1.09209
DDX17	1.46097	1.05279
DGAT1	1.46097	0.509175
diacylglycerol	1.46097	N/A
EGLN3	1.46097	-2.20023
estrone	1.46097	N/A
gallic acid	1.46097	-1.66448
manganese	1.46097	0.640184
meclizine	1.46097	0.57735
mir-7	1.46097	-1.31838
NFkB (family)	1.46097	2
octanoic acid	1.46097	-2.41176
pentobarbital	1.46097	-1.6172
selenite	1.46097	-0.927173
JUND	1.45929	-0.37598
MAP3K14	1.45929	3.63686
mir-15	1.45929	-0.651761
morphine	1.45799	1.22377
MKNK1	1.45774	3.65655
FGF21	1.45693	0.940037
PPRC1	1.45693	1.72328
GATA2	1.45009	0.808127
P-values that are considered statistically significant (-log(p-value)>2) are shown in yellow. -log(z-score) values that indicate predicted activation are shown in red, -log(z-score) values that indicate predicted inactivation are shown in blue.

## Sheet: Supplemental table 3
	Supplemental table 3: differentially expressed genes in HFD + HC-24 vs HFD + vehicle
ENSMUS ID	Symbol	Gene name	HFD + vehicle vs chow		HFD + HC-24 vs HFD + vehicle
			fold-change	-log(p-value)	fold-change	-log(p-value)
ENSMUSG00000074469	Gm15348	predicted gene 15348	1.71177	1.91138	0.416063	4.39459
ENSMUSG00000031442	Mcf2l	mcf.2 transforming sequence-like	1.38269	1.06621	0.421108	5.63963
ENSMUSG00000034159	2310007B03Rik	RIKEN cDNA 2310007B03 gene	1.12211	0.238835	0.512153	2.99582
ENSMUSG00000096923	#N/A	#N/A (ENSMUSG00000096923)	1.34107	0.768166	0.519196	2.63685
ENSMUSG00000056487	Mettl7a2	methyltransferase like 7A2	0.811634	0.478833	0.555382	2.20225
ENSMUSG00000039021	Ttc16	tetratricopeptide repeat domain 16	1.2773	0.621234	0.565998	2.30007
ENSMUSG00000023795	#N/A	#N/A (ENSMUSG00000023795)	1.33252	0.758731	0.57135	2.16163
ENSMUSG00000050621	Rps27rt	ribosomal protein S27, retrogene	0.884543	0.338085	0.590622	2.96176
ENSMUSG00000053113	Socs3	suppressor of cytokine signaling 3	1.41006	1.47175	0.592741	3.16115
ENSMUSG00000024376	Epb41l4a	erythrocyte membrane protein band 4.1 like 4a	1.48817	1.52387	0.612111	2.4152
ENSMUSG00000029380	Cxcl1	chemokine (C-X-C motif) ligand 1	2.17285	6.3764	0.63992	2.6839
ENSMUSG00000030519	Apba2	amyloid beta (A4) precursor protein-binding, family A, member 2	1.6104	2.17968	0.646843	2.1993
ENSMUSG00000084880	Tomm6os	translocase of outer mitochondrial membrane 6, opposite strand	0.990111	0.0216049	0.669999	2.00449
ENSMUSG00000030031	Kbtbd8	kelch repeat and BTB (POZ) domain containing 8	1.34473	1.33416	0.695114	2.16503
ENSMUSG00000034591	Slc41a2	solute carrier family 41, member 2	1.35435	1.62134	0.705298	2.22598
ENSMUSG00000020926	Adam11	a disintegrin and metallopeptidase domain 11	0.707362	2.15521	0.712023	2.28506
ENSMUSG00000038718	Pbx3	pre B cell leukemia homeobox 3	1.32395	1.81779	0.730089	2.64112
ENSMUSG00000019564	Arid3a	AT rich interactive domain 3A (BRIGHT-like)	1.10381	0.407531	0.7453	2.26308
ENSMUSG00000024254	Abcg8	ATP-binding cassette, sub-family G (WHITE), member 8	1.37467	2.60759	0.770279	2.08967
ENSMUSG00000063445	Nmral1	NmrA-like family domain containing 1	1.04676	0.212596	0.795642	2.22435
ENSMUSG00000028901	Gmeb1	glucocorticoid modulatory element binding protein 1	0.927656	0.519401	0.821548	2.47924
ENSMUSG00000025173	Wdr45b	WD repeat domain 45B	0.920657	0.54672	0.827789	2.06212
ENSMUSG00000075225	Ccdc162	coiled-coil domain containing 162	1.11041	0.757031	0.831828	2.04005
ENSMUSG00000043190	Rfesd	Rieske (Fe-S) domain containing	0.909057	0.865246	0.848593	2.2849
ENSMUSG00000022019	Tdrd3	tudor domain containing 3	0.984761	0.091145	0.855154	2.13964
ENSMUSG00000030232	Aebp2	AE binding protein 2	1.27977	5.10371	1.14814	2.27814
ENSMUSG00000084983	#N/A	#N/A (ENSMUSG00000084983)	0.97246	0.195822	1.15322	2.08198
ENSMUSG00000055148	Klf2	Kruppel-like factor 2 (lung)	0.92477	0.517116	1.234	2.65474
ENSMUSG00000018405	Mrm1	mitochondrial rRNA methyltransferase 1	0.767061	2.65396	1.25109	2.38099
ENSMUSG00000036158	Prickle1	prickle planar cell polarity protein 1	0.809861	1.71383	1.2525	2.2785
ENSMUSG00000014633	Cmc2	COX assembly mitochondrial protein 2	1.0041	0.0155762	1.25757	2.18738
ENSMUSG00000006930	Hap1	huntingtin-associated protein 1	1.21695	1.20421	1.26866	2.09603
ENSMUSG00000087590	Epb41l4aos	erythrocyte membrane protein band 4.1 like 4a, opposite strand	0.764119	1.58537	1.35389	2.14977
ENSMUSG00000062488	Ifit3b	interferon-induced protein with tetratricopeptide repeats 3B	1.48234	2.58248	1.40367	2.49478
ENSMUSG00000104445	Rhbg	Rhesus blood group-associated B glycoprotein	0.647639	2.90732	1.41047	2.20216
ENSMUSG00000038253	Hoxa5	homeobox A5	1.04983	0.121487	1.4352	2.10568
ENSMUSG00000097039	Pvt1	plasmacytoma variant translocation 1	0.673894	2.89586	1.45811	3.05816
ENSMUSG00000082465	#N/A	#N/A (ENSMUSG00000082465)	0.70615	1.46972	1.5248	2.35387
ENSMUSG00000108732	#N/A	#N/A (ENSMUSG00000108732)	0.844775	0.386287	1.69596	2.24258
ENSMUSG00000068392	Rnase13	ribonuclease, RNase A family, 13 (non-active)	0.433599	4.06868	1.7325	2.0612
ENSMUSG00000050295	Foxc1	forkhead box C1	0.810802	0.482449	1.73549	2.02732
ENSMUSG00000050192	Eif5a2	eukaryotic translation initiation factor 5A2	1.08553	0.163555	1.73597	2.49248
ENSMUSG00000033847	Pla2g4c	phospholipase A2, group IVC (cytosolic, calcium-independent)	0.979588	0.0357156	1.74278	2.01073
ENSMUSG00000062382	#N/A	#N/A (ENSMUSG00000062382)	0.942661	0.109197	1.74302	2.35135
ENSMUSG00000040016	Ptger3	prostaglandin E receptor 3 (subtype EP3)	1.04898	0.0924661	1.78107	2.22295
ENSMUSG00000086638	4930405A21Rik	RIKEN cDNA 4930405A21 gene	1.12553	0.23584	1.78862	2.29213
ENSMUSG00000097152	#N/A	#N/A (ENSMUSG00000097152)	0.702665	1.01501	1.80571	2.41164
ENSMUSG00000097671	#N/A	#N/A (ENSMUSG00000097671)	0.57005	2.11168	1.81406	2.26166
ENSMUSG00000023132	Gzma	granzyme A	1.34208	0.775834	1.89111	2.67396
ENSMUSG00000097794	#N/A	#N/A (ENSMUSG00000097794)	1.4301	1.06579	2.01876	2.95895
	Fold-changes that reflect an increase in gene expression are indicated in red, fold-changes that reflect a reduction in gene expression are indicated in blue. P-values that are considered statistically significant (-log(p-value)>2) are shown in yellow.

## Sheet: Supplemental table 4
Supplemental table 4: modulated upstream regulators in HFD + HC-24 vs HFD + vehicle
Upstream regulator	HFD + vehicle vs chow		HFD + HC-24 vs HFD + vehicle
	-log(p-value)	-log(z-value)	-log(p-value)	-log(z-value)
RARB	4.43949	1.89474	3.96934	N/A
DNASE2	5.02883	-2.57333	3.93442	N/A
E. coli B4 lipopolysaccharide	20.1814	6.50557	3.89124	-0.299847
TBL1XR1	2.08496	N/A	3.67326	N/A
TBL1X	1.32529	N/A	3.67326	N/A
cholesterol	20.9356	5.50167	3.48604	-1.97835
MAVS	0.663112	3.05501	3.22093	N/A
mir-204	N/A	N/A	3.16606	N/A
IFNAR1	12.3905	4.48085	3.16384	N/A
CGAS	3.28512	2.60801	3.1047	N/A
MESP1	N/A	N/A	3.04748	N/A
RORC	19.238	0.816497	3.03322	N/A
RNA polymerase II	6.8312	N/A	3.02147	N/A
C5	1.54033	3.31258	2.99391	N/A
STAP2	0.682716	2	2.99391	N/A
FABP5	0.682716	-2.18938	2.99391	N/A
NOD2	2.48402	3.73294	2.9512	N/A
FMO3	N/A	N/A	2.94353	N/A
CYP27A1	6.0314	0.220644	2.85103	N/A
IL21	5.60179	3.64272	2.83841	0.5547
HOXA10	9.13367	-1.02472	2.80241	N/A
PBX3	N/A	N/A	2.76773	N/A
TET1	N/A	N/A	2.76773	N/A
NR5A2	3.2551	0.233746	2.71748	N/A
TRPV4	4.66195	3.70412	2.69199	N/A
HSPD1	0.310842	2.21321	2.69199	N/A
Stat3-Stat3	N/A	N/A	2.69199	N/A
RORA	17.7706	0.919987	2.68309	N/A
SAMSN1	2.98377	4.01663	2.67588	N/A
ELOVL5	1.5543	-0.95976	2.55852	N/A
Ctf2	N/A	N/A	2.55423	N/A
TGFB1	43.714	8.47314	2.52	-1.28896
IL17A	9.60102	5.09606	2.43646	-1.1316
MEIS1	1.35276	2.39619	2.39172	N/A
ELF4	1.35276	1.57143	2.39172	N/A
TET2	4.25901	3.16228	2.3779	N/A
IFNE	3.38518	2.37577	2.34289	N/A
CREBBP	7.86825	2.72636	2.33073	N/A
ACKR2	5.71167	-4.02492	2.31954	N/A
IRF9	N/A	N/A	2.31954	N/A
NPM1	N/A	N/A	2.31954	N/A
TLR3	6.04161	5.84595	2.26332	-0.293105
ALAS1	N/A	N/A	2.25379	N/A
HMGCS2	N/A	N/A	2.25379	N/A
L-leucine	N/A	N/A	2.25379	N/A
MMP10	N/A	N/A	2.25379	N/A
PTPRT	N/A	N/A	2.25379	N/A
Rbp	N/A	N/A	2.25379	N/A
REG3A	N/A	N/A	2.25379	N/A
SOCS1	6.34741	-4.72805	2.24017	N/A
RNASEH2A	3.65764	N/A	2.2323	N/A
JAK	2.20987	1.73205	2.2323	N/A
Irgm1	7.09125	-4.48665	2.19198	N/A
ARHGAP21	2.85785	2.66789	2.19198	N/A
RARG	1.62368	0.973645	2.19198	N/A
IFNLR1	4.26314	N/A	2.17255	N/A
CD3 group	0	2.37993	2.17255	N/A
ZMPSTE24	5.26782	-1.46261	2.15358	N/A
TXNIP	3.06473	0.759394	2.15358	N/A
PRL	13.8899	4.9944	2.14826	0.0830455
TICAM1	7.95979	5.22012	2.13452	N/A
ADRB	11.8352	-0.324935	2.12616	N/A
IL7	2.25732	1.86251	2.12616	N/A
LEP	14.159	2.2525	2.1261	N/A
HNF1A	7.92148	-1.13607	2.10191	N/A
IFNB1	14.5507	4.95435	2.09963	N/A
MAPK7	3.98731	3.2922	2.08191	N/A
ERO1A	N/A	N/A	2.0783	N/A
IL10R	N/A	N/A	2.0783	N/A
LIFR	N/A	N/A	2.0783	N/A
mir-483	N/A	N/A	2.0783	N/A
ATG7	3.2117	-1.24175	2.04836	N/A
STAT6	10.4322	0.739334	2.04262	-1
STAT2	1.55437	1.59471	2.0321	N/A
NR1H4	6.02682	-1.18844	2.00068	N/A
leukotriene D4	2.73459	4.38595	1.98524	N/A
HNF4A	16.3024	-3.07075	1.97784	-0.372902
IL1B	24.5419	7.81826	1.97319	-1.39661
CD14	1.27493	2.79535	1.97022	N/A
CSHL1	1.80571	0.0450345	1.95548	N/A
CYP8B1	1.6306	N/A	1.95396	N/A
CC-122	N/A	N/A	1.95396	N/A
CCL22	N/A	N/A	1.95396	N/A
CFH	N/A	N/A	1.95396	N/A
LPCAT3	N/A	N/A	1.95396	N/A
PELI2	N/A	N/A	1.95396	N/A
PHF19	N/A	N/A	1.95396	N/A
RAPSN	N/A	N/A	1.95396	N/A
Rsk	N/A	N/A	1.95396	N/A
SRT1720	N/A	N/A	1.95396	N/A
TRHR	N/A	N/A	1.95396	N/A
P-values that are considered statistically significant (-log(p-value)>2) are shown in yellow. -log(z-score) values that indicate predicted activation are shown in red, -log(z-score) values that indicate predicted inactivation are shown in blue.
